# Supplementary material for: Synthesis of single CsPbBr3@SiO2 core–shell particles via surface activation
Source: Royal Society of Chemistry journal article supplement (doi:10.1039/d0tc03932b), 2020-01-01
Supplement: d0tc03932b1.pdf [file d0tc03932b1.pdf]

## Supporting Information

### **Synthesis of single CsPbBr<sub>3</sub>@SiO<sub>2</sub> core-shell particles via surface activation**

Cuifang Meng, Dandan Yang, Ye Wu, Xuejia Zhang, Haibo Zeng and Xiaoming Li\*

Key Laboratory of Advanced Display Materials and Devices, Ministry of Industry and Information Technology, Institute of Optoelectronics & Nanomaterials, School of Material Science and Engineering, Nanjing University of Science and Technology, Nanjing, 210094 China.

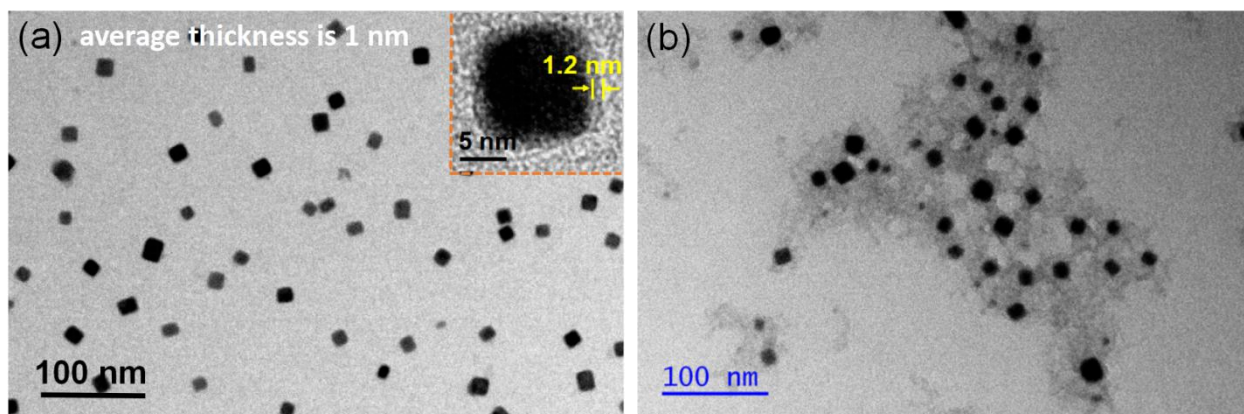

**Fig. S1** TEM images of APTES-QDs@SiO<sub>2</sub> obtained by reacting APTES-QDs with (a) 3  $\mu$ L TMOS and (b) 12  $\mu$ L TMOS (adding 3  $\mu$ L per 1 h) for 4 h.

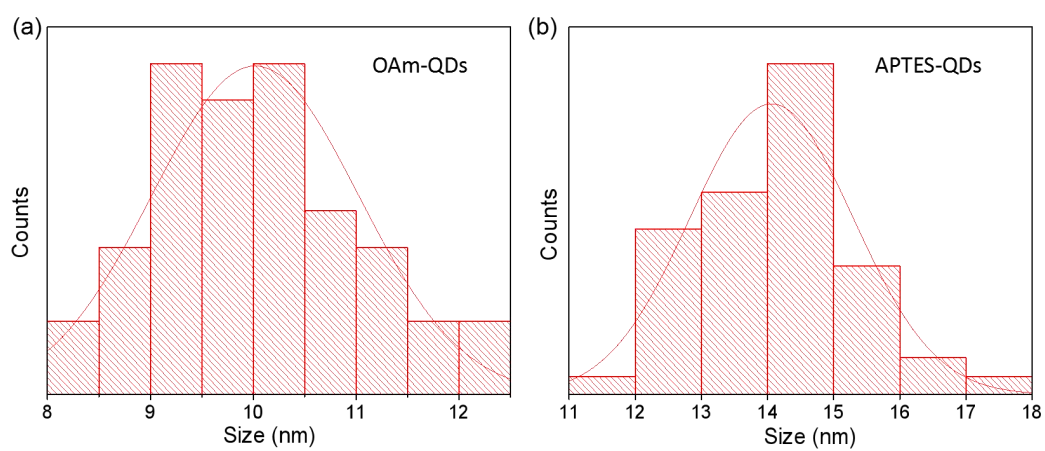

**Fig. S2** Size distributions of (a) OAm-QDs, and (b) APTES-QDs.

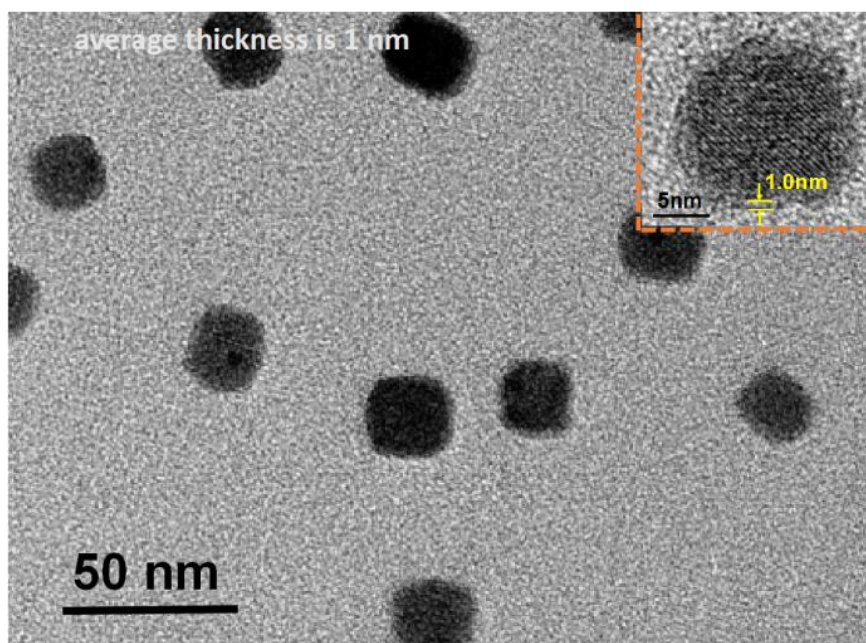

**Fig. S3** TEM images of APTES-QDs@SiO<sub>2</sub> obtained by reacting APTES-QDs with 3  $\mu$ l TMOS and 15  $\mu$ l TEOS for 4 h.

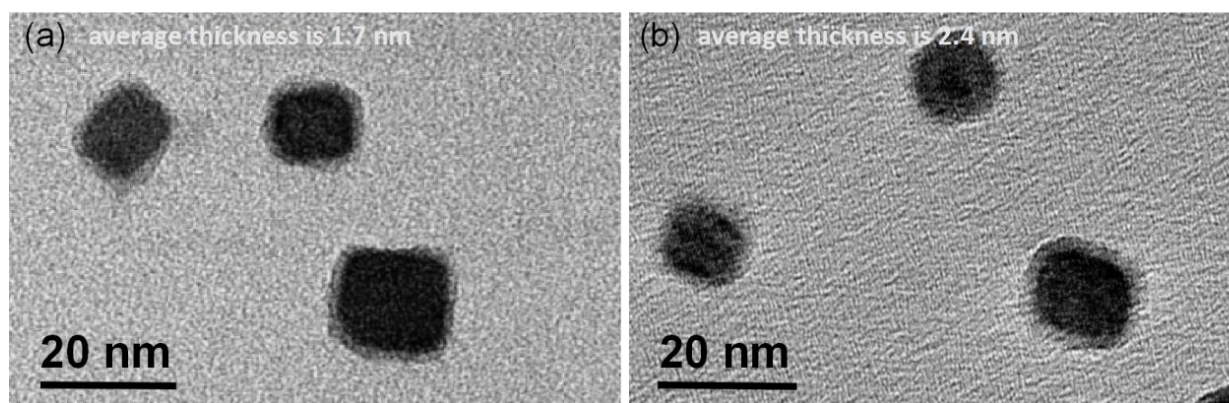

**Fig. S4** TEM images of APTES-QDs@SiO<sub>2</sub> obtained by reacting APTES-QDs with 3  $\mu$ l TMOS and (a) 150  $\mu$ l TEOS, and (b) 450  $\mu$ l TEOS for 4 h.

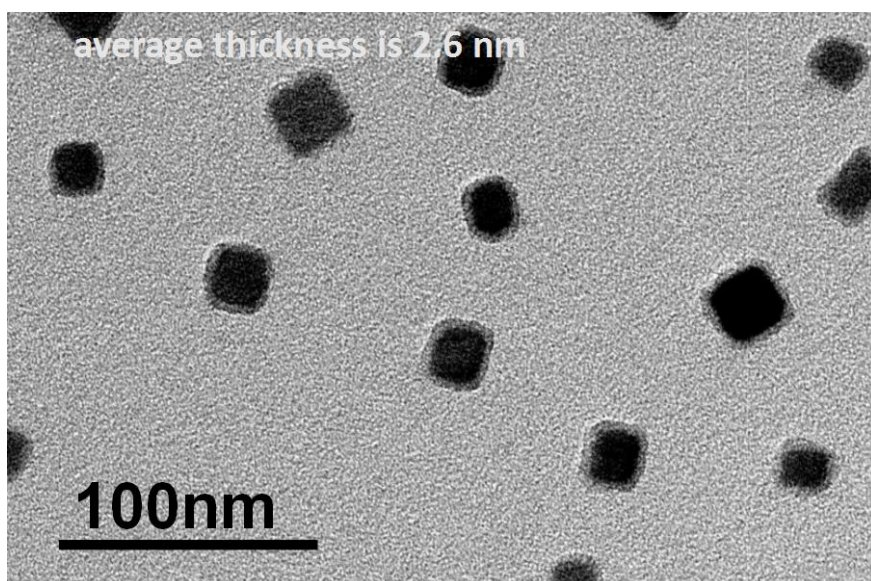

**Fig. S5** TEM images of APTES-QDs@SiO<sub>2</sub> obtained by reacting APTES-QDs with 3  $\mu$ l TMOS and 450  $\mu$ l TEOS for 72 h.

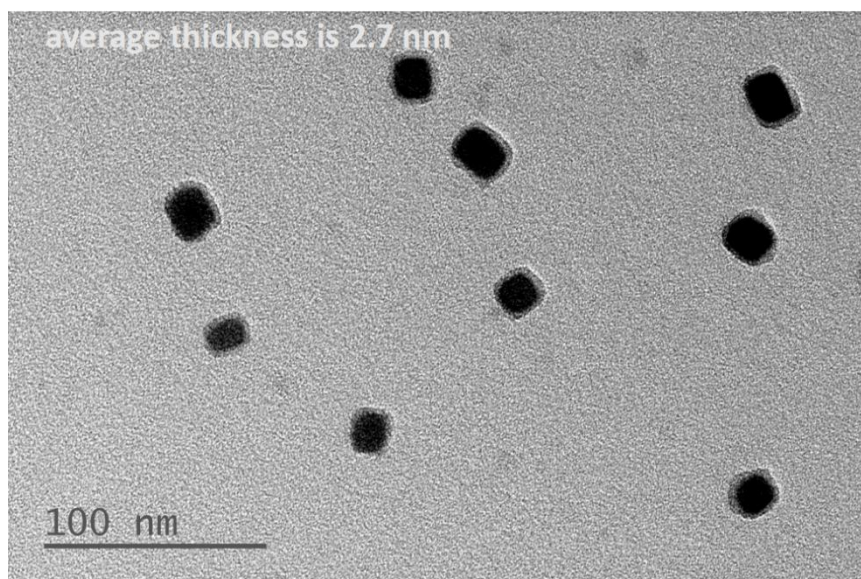

**Fig. S6** TEM images of APTES-QDs@SiO<sub>2</sub> obtained by reacting APTES-QDs with 3  $\mu$ l TMOS and 2.4 ml TEOS for 72 h.

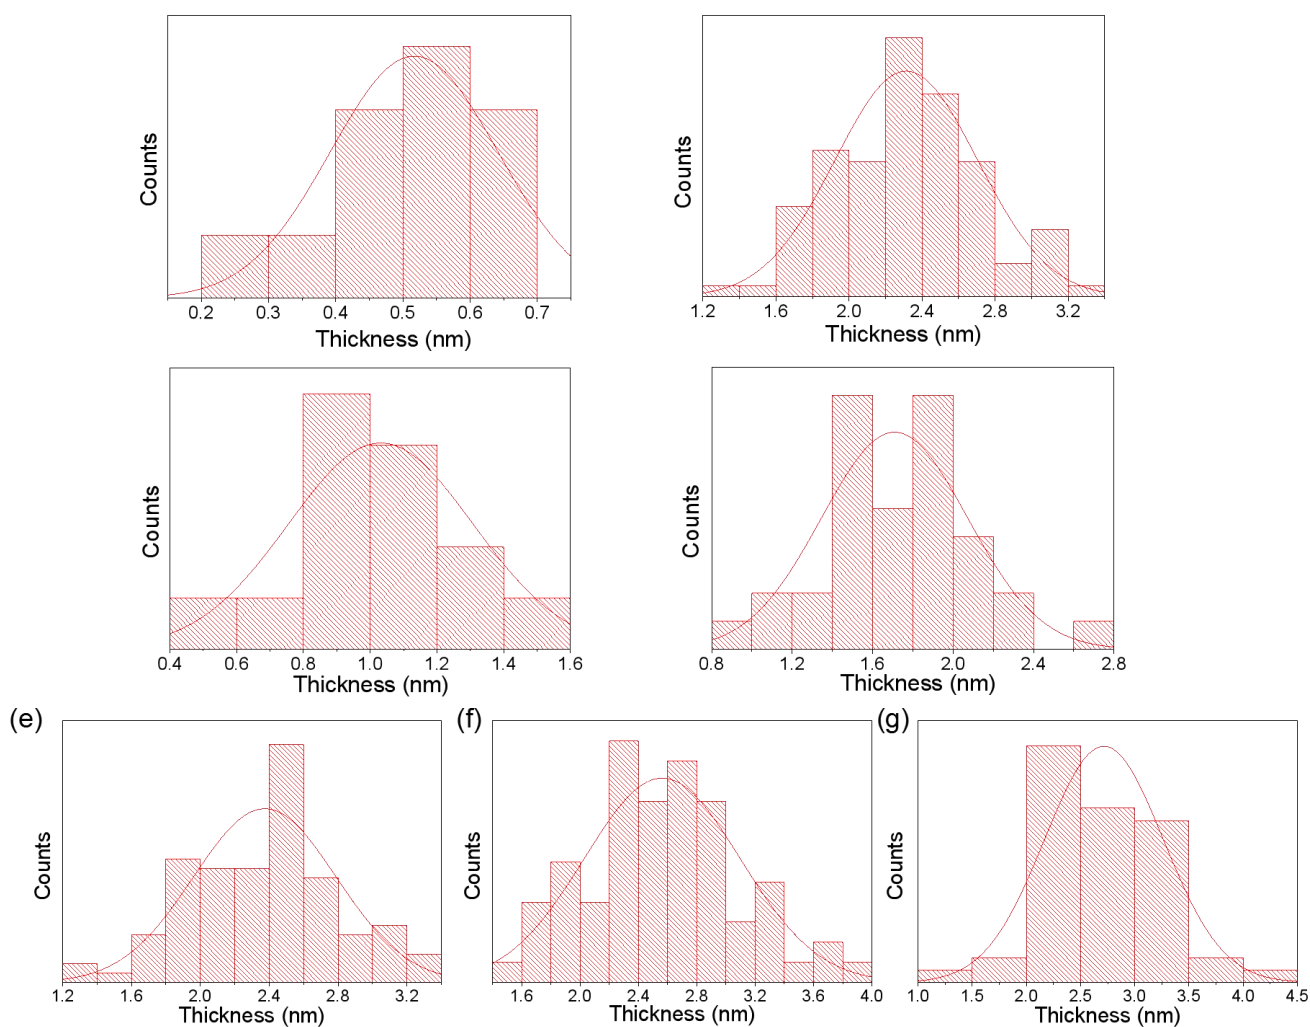

**Fig. S7** Thickness distributions of SiO<sub>2</sub> obtained by reacting APTES-QDs with (a) 3 ul TMOS for 1 h, (b) 3 ul TMOS and 300 ul TEOS for 4 h, (c) 3 ul TMOS and 15 ul TEOS for 4 h, (d) 3 ul TMOS and 150 ul TEOS for 4 h, (e) 3 ul TMOS and 450 ul TEOS for 4 h, (f) 3 ul TMOS and 450 ul TEOS for 72 h, and (g) 3 ul TMOS and 2.4ml TEOS for 72 h.

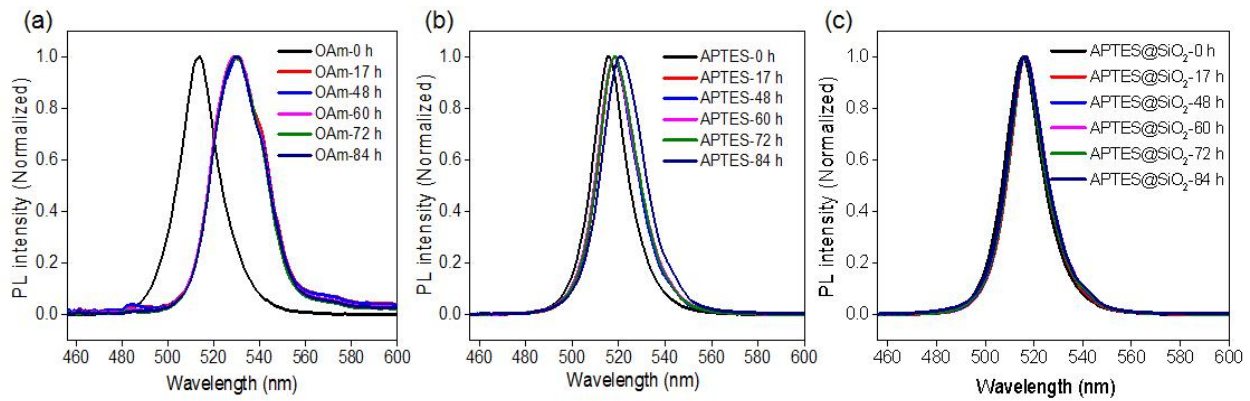

**Fig. S8** PL curves of the (a) OAm-QDs, (b) APTES-QDs, and (c) APTES-QDs@SiO<sub>2</sub> films after being treated at 60 °C for a different time. The additional peak at 481nm in Fig. (a) was due to the glass substrate, not a new luminescence peak.

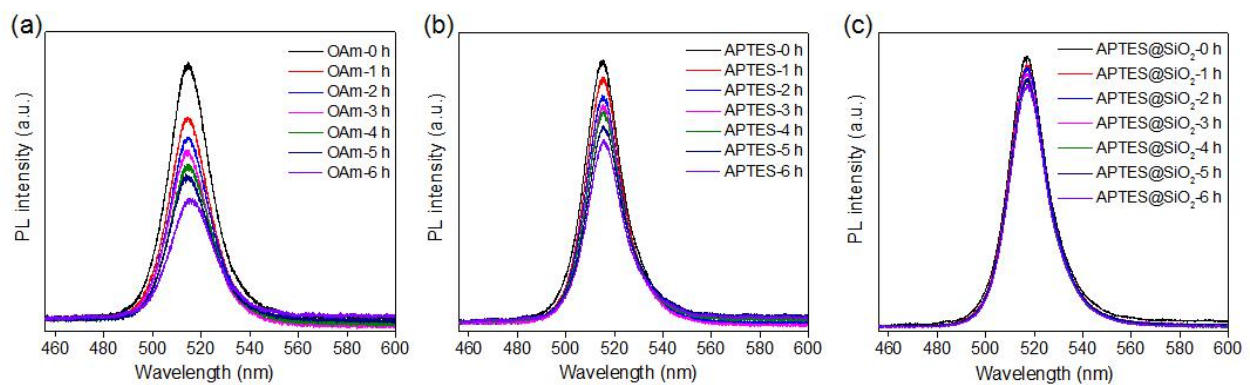

**Fig. S9** PL curves of the (a) OAm-QDs, (b) APTES-QDs, and (c) APTES-QDs@SiO<sub>2</sub> films stored in a constant environment (25 °C and humidity of 70%) for a short time.

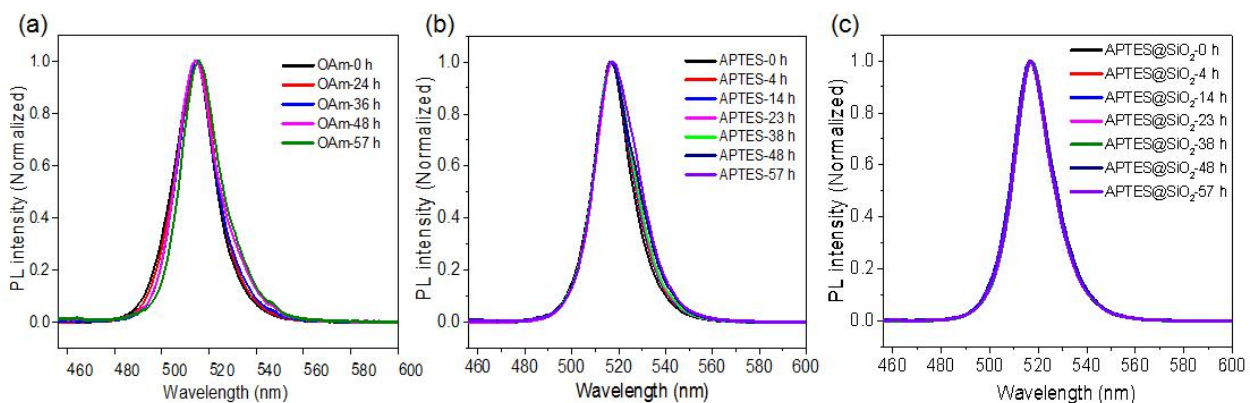

**Fig. S10** PL curves of the (a) OAm-QDs, (b) APTES-QDs, and (c) APTES-QDs@SiO<sub>2</sub> films stored in a constant environment (25 °C and humidity of 70%) for a long time.

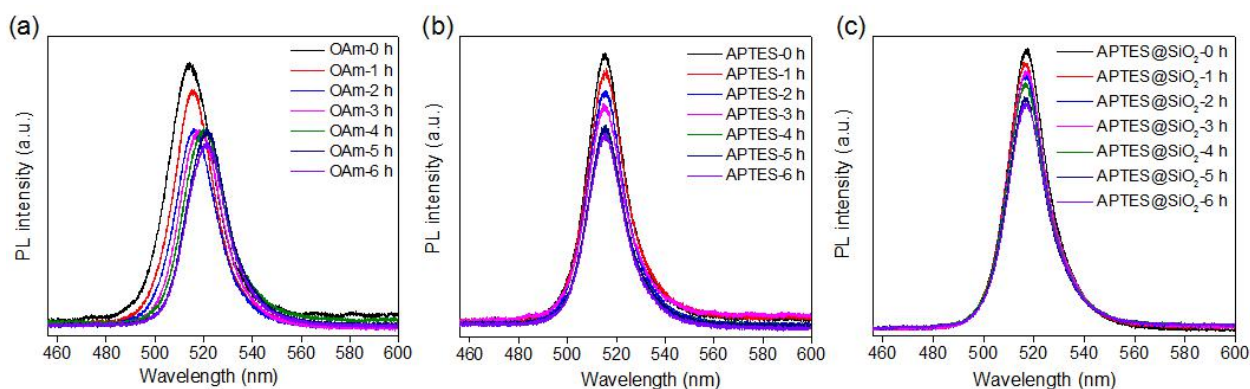

**Fig. S11** PL curves of the (a) OAm-QDs, (b) APTES-QDs, and (c) APTES-QDs@SiO<sub>2</sub> films under UV light (365 nm, 80 mW cm<sup>-2</sup>) irradiation for a short time.

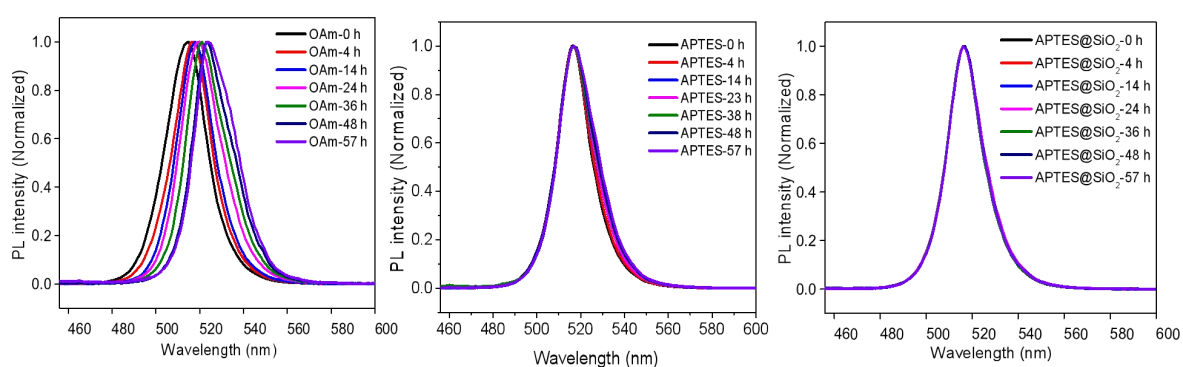

**Fig. S12** PL curves of the (a) OAm-QDs, (b) APTES-QDs, and (c) APTES-QDs@SiO<sub>2</sub> films under UV light (365 nm, 80 mW cm<sup>-2</sup>) irradiation for a long time.

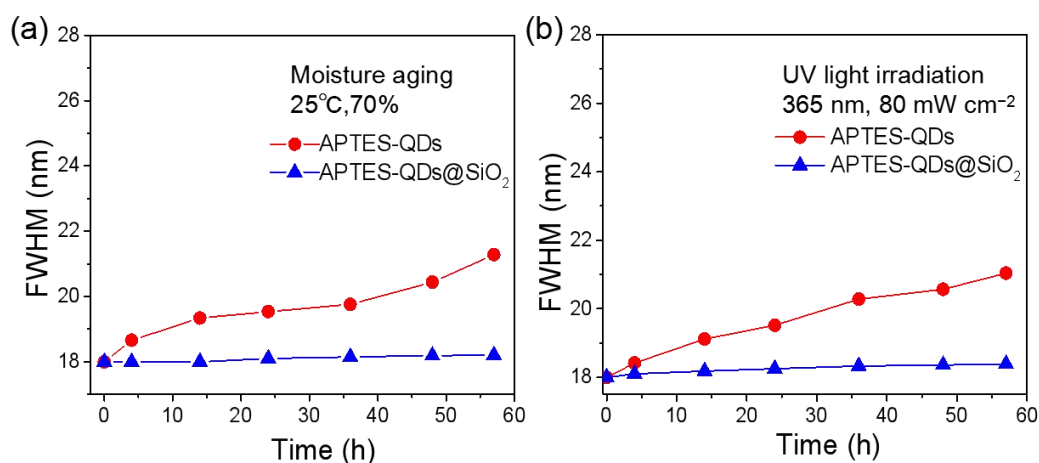

**Fig. S13** FWHM of APTES-QDs, and APTES-QDs@SiO<sub>2</sub> films (a) stored in a constant environment (25 °C and humidity of 70%), and (e) under UV light (365 nm, 80 mW cm<sup>-2</sup>) irradiation.

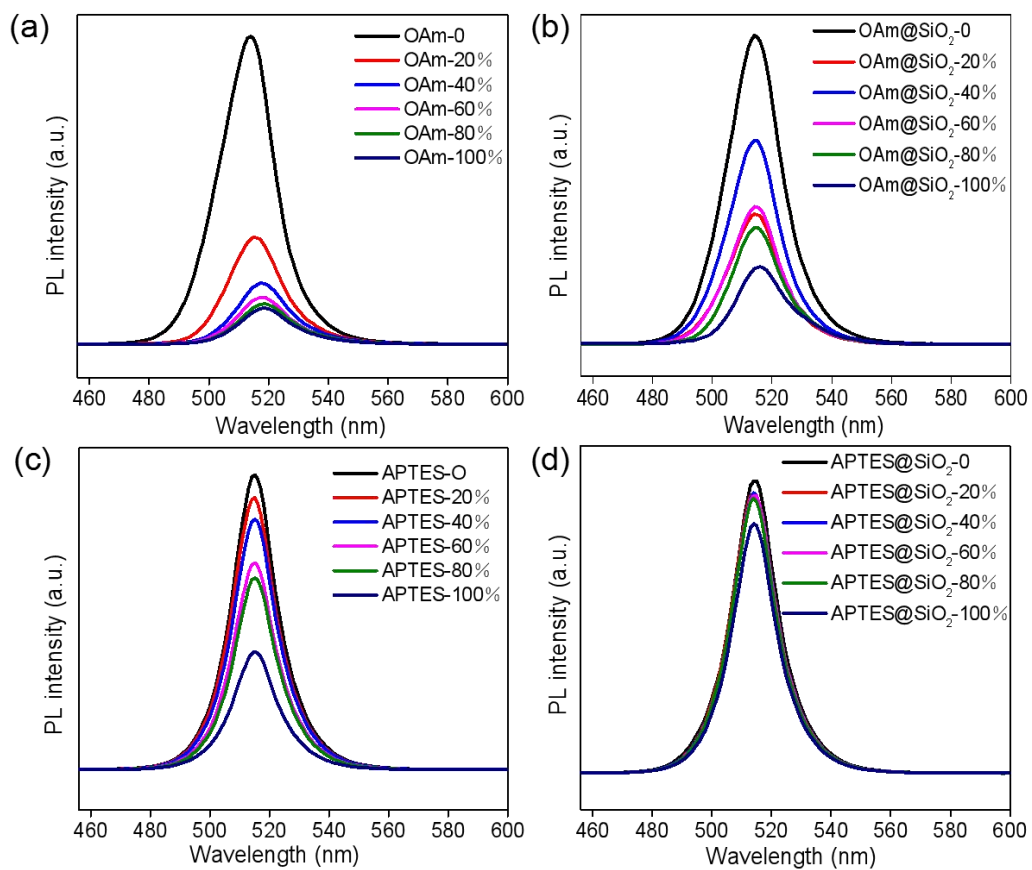

**Fig. S14** PL curves of the (a) OAm-QDs, (b) OAm@SiO<sub>2</sub> (c) APTES-QDs, and (d) APTES-QDs@SiO<sub>2</sub> treated with ethanol of varying volume ratios.



**Table S1** The average lifetimes of OAm-QDs, APTES-QDs, and APTES-QDs@SiO<sub>2</sub>. The time-resolved PL decay curve were fitted by the biexponential decay function of  $A(t) = A_1 \exp\left(-\frac{t}{\tau_1}\right) + A_2 \exp\left(-\frac{t}{\tau_2}\right)$ , and the average lifetime were calculated using

$$\tau_{ave} = \frac{A_1 \tau_1^2 + A_2 \tau_2^2}{A_1 \tau_1 + A_2 \tau_2} \cdot 1$$

| Sample code                | A <sub>1</sub> | τ <sub>1</sub> (ns) | A <sub>2</sub> | τ <sub>2</sub> (ns) | τ <sub>ave</sub> (ns) |
|----------------------------|----------------|---------------------|----------------|---------------------|-----------------------|
| OAm-QDs                    | 0.73           | 6.6                 | 0.22           | 2.28                | 6.19                  |
| APTES-QDs                  | 0.43           | 22.14               | 0.48           | 3.72                | 19.23                 |
| APTES-QDs@SiO <sub>2</sub> | 0.44           | 27.62               | 0.48           | 5.06                | 23.86                 |

## References

- 1 B. Huang, H. Yang, L. Zhang, Y. Yuan, Y. Cui and J. Zhang, *Nanoscale*, 2018, **10**, 18331-18340.
